# Supplementary material for: The importance of tetrel bonding interactions with carbon in two arrestive iso-structural Cd(ii)–Salen coordination complexes: a comprehensive DFT overview in crystal engineering
Source: Royal Society of Chemistry journal article supplement (doi:10.1039/d2ra07080d), 2022-01-01
Supplement: d2ra07080d3.pdf [file d2ra07080d3.pdf]

**The Importance of Tetrel Bonding Interactions with Carbon in Works of Two Arrestive Iso-Structural Cd(II)-Salen Coordination Complexes: A Comprehensive DFT Overview in Crystal Engineering**

Dhrubajyoti Majumdar <sup>a\*,b</sup>, Sourav Roy <sup>c</sup>, and Antonio Frontera <sup>d\*</sup>

<sup>a</sup> Department of Chemistry, Tamralipta Mahavidyalaya, Tamluk 721636, West Bengal, India

<sup>b</sup> Department of Chemistry and Chemical Biology, Indian Institute of Technology (Indian School of Mines), Dhanbad, Jharkhand 826004, India

<sup>c</sup> Solid State and Structural Chemistry Unit, Indian Institute of Science, Bangalore 560 012, India

<sup>d</sup> Department de Química, Universitat de les Illes Balears, Cra. de Valldemossa km 7.5. 07122 Palma de Mallorca (Balears), Spain

CORRESPONDING AUTHOR EMAIL: [dmajumdar30@gmail.com](mailto:dmajumdar30@gmail.com), [toni.frontera@uib.es](mailto:toni.frontera@uib.es)

| Captions                                                                                                                                                               | Schemes/Tables/Figures                         |
|------------------------------------------------------------------------------------------------------------------------------------------------------------------------|------------------------------------------------|
| <p>1. a) Different complexing modes of SCN<sup>-</sup> spacer.<br/>b) Generation of polymeric complexes in the presence of Pseudohalide spacers (SCN<sup>-</sup>).</p> | <p><b>SCHEME S1A</b><br/><b>SCHEME S1B</b></p> |
| <p>2. Salen Ligand compartment mobility (N<sub>2</sub>O<sub>2</sub> vs O<sub>4</sub>) with M<sup>2+</sup> metal ion</p>                                                | <p><b>SCHEME S2</b></p>                        |
| <p>3. The simplified Holo-directed and Hemi-directed coordination spheres around the Pb(II) metal ion.</p>                                                             | <p><b>SCHEME S3</b></p>                        |
| <p>4. Selected important bond distances (Å) and Bond angles (°) for the complex.</p>                                                                                   | <p><b>TABLE S1</b></p>                         |
| <p>5. Reported Covalent and Tetrel bond lengths (Å) distances for Pb(II) complexes.</p>                                                                                | <p><b>TABLE S2</b><br/><b>TABLE S3</b></p>     |
| <p>6. EDAX analysis of weight (%) contribution of elements.</p>                                                                                                        | <p><b>FIGURE S1</b></p>                        |
| <p>7. Representative IR spectra for the Salen ligands.</p>                                                                                                             | <p><b>FIGURE S2</b></p>                        |
| <p>8. Representative IR spectra for the complex.</p>                                                                                                                   | <p><b>FIGURE S3</b></p>                        |
| <p>9. Representative Raman spectra for the complex.</p>                                                                                                                | <p><b>FIGURE S4</b></p>                        |
| <p>10. Representative UV-Vis for the Salen ligands.</p>                                                                                                                | <p><b>FIGURE S5</b></p>                        |
| <p>11. Representative UV-Vis for the complex.</p>                                                                                                                      | <p><b>FIGURE S6</b></p>                        |
| <p>12. Representative <sup>1</sup>H NMR spectra for H<sub>2</sub>L<sup>1</sup>- H<sub>2</sub>L<sup>2</sup>.</p>                                                        | <p><b>FIGURE S7</b></p>                        |
| <p>13. Representative <sup>13</sup>C NMR spectra for H<sub>2</sub>L<sup>1</sup>- H<sub>2</sub>L<sup>2</sup>.</p>                                                       | <p><b>FIGURE S8</b></p>                        |
| <p>14. Representative <sup>1</sup>H NMR spectra for the complex.</p>                                                                                                   | <p><b>FIGURE S9</b></p>                        |
| <p>15. EDX profile for <b>1</b>.</p>                                                                                                                                   | <p><b>FIGURE S10</b></p>                       |
| <p>16. SEM image profile for <b>1 (a-e)</b>.</p>                                                                                                                       | <p><b>FIGURE S11</b></p>                       |
| <p>17. PXRD profile for <b>1</b>.</p>                                                                                                                                  | <p><b>FIGURE S12</b></p>                       |
| <p>18. An unusual open cubane structure was observed in the complexes.</p>                                                                                             |                                                |

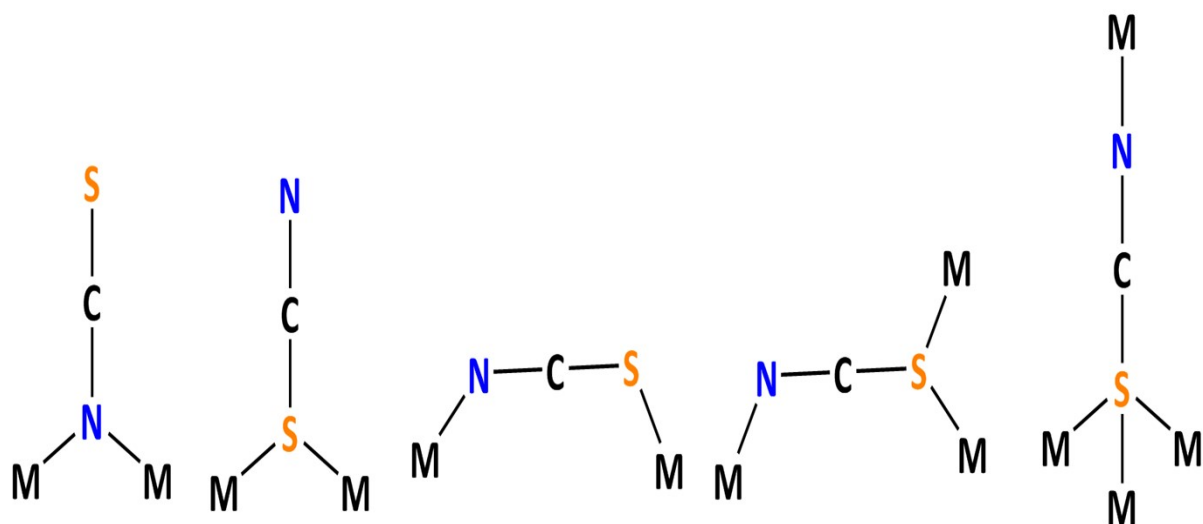

**Scheme S1A.** Different complexing modes of SCN<sup>-</sup> spacer.

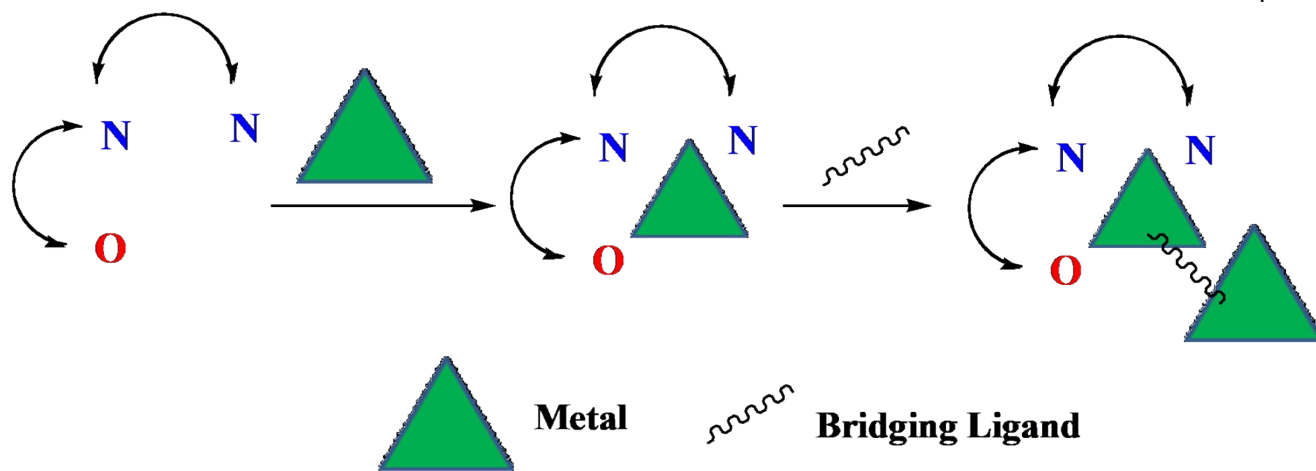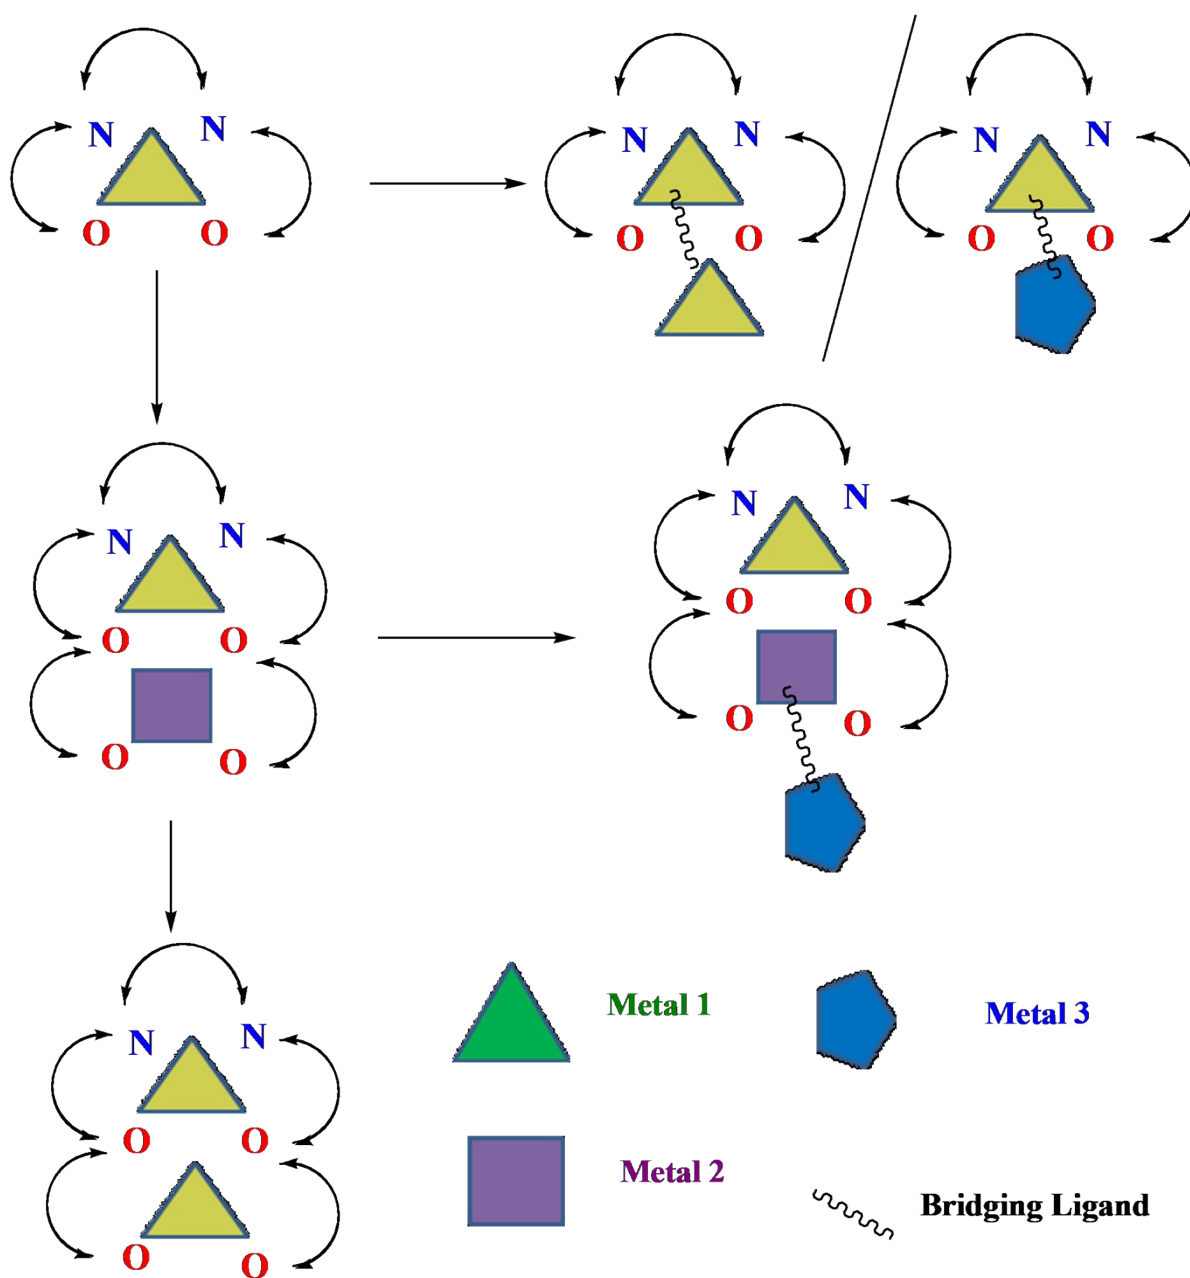

**SCHEME S1B.** Generation of polynuclear complexes in the presence of pseudohalide spacers ( $\text{SCN}^-$ ).

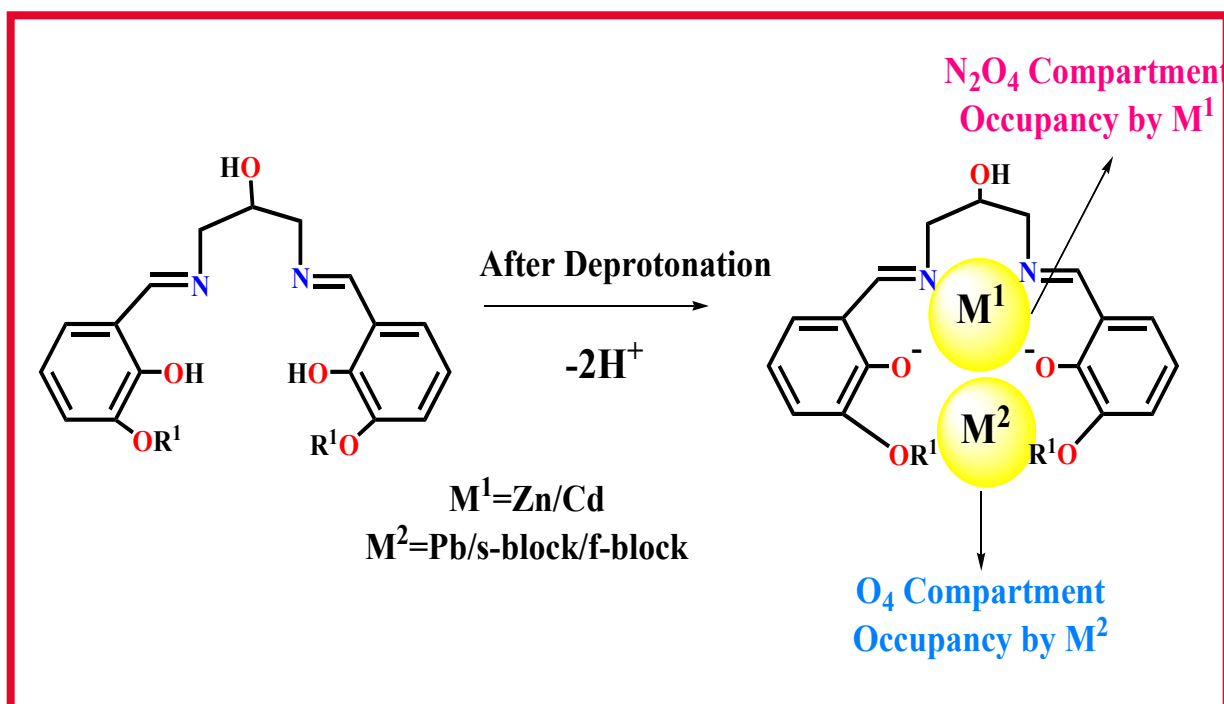

SCHEME S2. Salen ligand compartment mobility ( $\text{N}_2\text{O}_2$  vs  $\text{O}_4$ ) with  $\text{M}^{2+}$  metal ion.

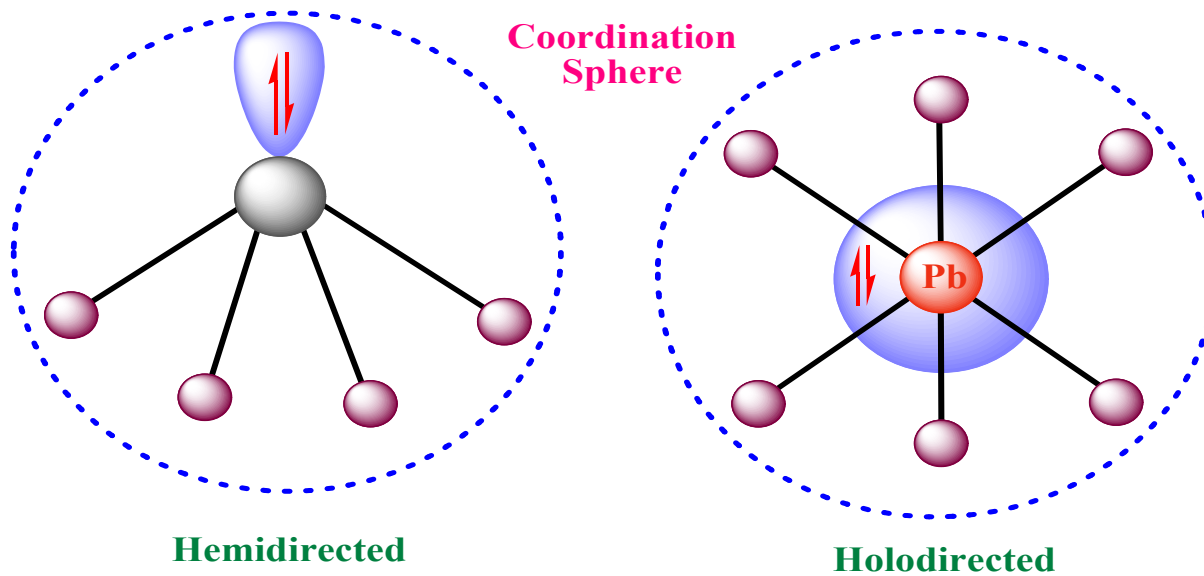

SCHEME S3. The simplified Holo-directed and Hemi-directed coordination spheres around.

**Table S1 Bond lengths [Å] and angles [°] for complex 1**

|                     |           |
|---------------------|-----------|
| Cd(1)-O(3)          | 2.279(6)  |
| Cd(1)-O(6)#1        | 2.317(8)  |
| Cd(1)-O(2)#1        | 2.319(6)  |
| Cd(1)-N(2)          | 2.327(10) |
| Cd(1)-N(1)          | 2.352(10) |
| Cd(1)-O(1)#1        | 2.440(8)  |
| Cd(1)-O(2)          | 2.500(6)  |
| Cd(02)-N(3)         | 2.160(11) |
| Cd(02)-O(3)         | 2.223(7)  |
| Cd(02)-O(6)         | 2.336(9)  |
| Cd(02)-O(2)#1       | 2.344(6)  |
| Cd(02)-O(5)         | 2.354(9)  |
| Cd(02)-O(4)         | 2.382(9)  |
| O(3)-Cd(1)-O(6)#1   | 92.6(3)   |
| O(3)-Cd(1)-O(2)#1   | 75.1(2)   |
| O(6)#1-Cd(1)-O(2)#1 | 105.4(3)  |
| O(3)-Cd(1)-N(2)     | 78.3(3)   |
| O(6)#1-Cd(1)-N(2)   | 91.6(4)   |
| O(2)#1-Cd(1)-N(2)   | 148.8(3)  |
| O(3)-Cd(1)-N(1)     | 150.8(3)  |
| O(6)#1-Cd(1)-N(1)   | 87.8(4)   |
| O(2)#1-Cd(1)-N(1)   | 132.8(3)  |
| N(2)-Cd(1)-N(1)     | 72.6(4)   |
| O(3)-Cd(1)-O(1)#1   | 98.4(3)   |
| O(6)#1-Cd(1)-O(1)#1 | 164.8(3)  |
| O(2)#1-Cd(1)-O(1)#1 | 67.8(3)   |
| N(2)-Cd(1)-O(1)#1   | 100.8(4)  |
| N(1)-Cd(1)-O(1)#1   | 87.7(4)   |
| O(3)-Cd(1)-O(2)     | 136.0(2)  |
| O(6)#1-Cd(1)-O(2)   | 73.2(2)   |
| O(2)#1-Cd(1)-O(2)   | 69.4(3)   |
| N(2)-Cd(1)-O(2)     | 141.5(3)  |
| N(1)-Cd(1)-O(2)     | 71.7(3)   |
| O(1)#1-Cd(1)-O(2)   | 91.6(2)   |
| N(3)-Cd(02)-O(3)    | 130.4(4)  |

|                       |          |
|-----------------------|----------|
| N(3)-Cd(02)-O(6)      | 129.9(4) |
| O(3)-Cd(02)-O(6)      | 98.5(3)  |
| N(3)-Cd(02)-O(2)#1    | 103.1(4) |
| O(3)-Cd(02)-O(2)#1    | 75.6(2)  |
| O(6)-Cd(02)-O(2)#1    | 75.9(2)  |
| N(3)-Cd(02)-O(5)      | 110.4(4) |
| O(3)-Cd(02)-O(5)      | 107.8(4) |
| O(6)-Cd(02)-O(5)      | 52.3(3)  |
| O(2)#1-Cd(02)-O(5)    | 128.2(3) |
| N(3)-Cd(02)-O(4)      | 89.0(4)  |
| O(3)-Cd(02)-O(4)      | 68.2(3)  |
| O(6)-Cd(02)-O(4)      | 124.0(4) |
| O(2)#1-Cd(02)-O(4)    | 140.4(3) |
| O(5)-Cd(02)-O(4)      | 79.4(4)  |
| Cd(1)#1-O(2)-Cd(02)#1 | 98.1(2)  |
| Cd(1)#1-O(2)-Cd(1)    | 100.4(2) |
| Cd(02)#1-O(2)-Cd(1)   | 98.6(2)  |
| Cd(02)-O(3)-Cd(1)     | 103.0(2) |

---

Symmetry transformations used to generate equivalent atoms:

#1 -x+1,y,-z+3/2

**Table S1 Bond lengths [Å] and angles [°] for complex 2.**

---

|               |           |
|---------------|-----------|
| Cd(1)-O(3)    | 2.282(6)  |
| Cd(1)-O(6)#1  | 2.316(8)  |
| Cd(1)-O(2)#1  | 2.316(6)  |
| Cd(1)-N(2)    | 2.329(11) |
| Cd(1)-N(1)    | 2.359(10) |
| Cd(1)-O(1)#1  | 2.440(8)  |
| Cd(1)-O(2)    | 2.499(6)  |
| Cd(02)-N(3)   | 2.166(11) |
| Cd(02)-O(3)   | 2.224(7)  |
| Cd(02)-O(6)   | 2.337(9)  |
| Cd(02)-O(2)#1 | 2.344(6)  |
| Cd(02)-O(5)   | 2.356(9)  |
| Cd(02)-O(4)   | 2.381(9)  |

|                       |          |
|-----------------------|----------|
| O(3)-Cd(1)-O(6)#1     | 92.5(3)  |
| O(3)-Cd(1)-O(2)#1     | 75.1(2)  |
| O(6)#1-Cd(1)-O(2)#1   | 105.3(3) |
| O(3)-Cd(1)-N(2)       | 78.2(3)  |
| O(6)#1-Cd(1)-N(2)     | 91.7(4)  |
| O(2)#1-Cd(1)-N(2)     | 148.8(3) |
| O(3)-Cd(1)-N(1)       | 150.2(3) |
| O(6)#1-Cd(1)-N(1)     | 87.7(4)  |
| O(2)#1-Cd(1)-N(1)     | 133.4(3) |
| N(2)-Cd(1)-N(1)       | 72.0(4)  |
| O(3)-Cd(1)-O(1)#1     | 98.3(3)  |
| O(6)#1-Cd(1)-O(1)#1   | 164.8(3) |
| O(2)#1-Cd(1)-O(1)#1   | 67.6(3)  |
| N(2)-Cd(1)-O(1)#1     | 100.9(4) |
| N(1)-Cd(1)-O(1)#1     | 88.2(4)  |
| O(3)-Cd(1)-O(2)       | 136.0(2) |
| O(6)#1-Cd(1)-O(2)     | 73.2(3)  |
| O(2)#1-Cd(1)-O(2)     | 69.4(3)  |
| N(2)-Cd(1)-O(2)       | 141.6(3) |
| N(1)-Cd(1)-O(2)       | 72.3(3)  |
| O(1)#1-Cd(1)-O(2)     | 91.6(2)  |
| N(3)-Cd(02)-O(3)      | 130.3(4) |
| N(3)-Cd(02)-O(6)      | 130.0(4) |
| O(3)-Cd(02)-O(6)      | 98.5(3)  |
| N(3)-Cd(02)-O(2)#1    | 103.2(4) |
| O(3)-Cd(02)-O(2)#1    | 75.6(2)  |
| O(6)-Cd(02)-O(2)#1    | 75.8(2)  |
| N(3)-Cd(02)-O(5)      | 110.4(5) |
| O(3)-Cd(02)-O(5)      | 107.8(4) |
| O(6)-Cd(02)-O(5)      | 52.4(3)  |
| O(2)#1-Cd(02)-O(5)    | 128.1(3) |
| N(3)-Cd(02)-O(4)      | 89.1(4)  |
| O(3)-Cd(02)-O(4)      | 67.9(3)  |
| O(6)-Cd(02)-O(4)      | 124.0(4) |
| O(2)#1-Cd(02)-O(4)    | 140.3(3) |
| O(5)-Cd(02)-O(4)      | 79.4(4)  |
| Cd(1)#1-O(2)-Cd(02)#1 | 98.2(2)  |
| Cd(1)#1-O(2)-Cd(1)    | 100.5(2) |



|                     |          |
|---------------------|----------|
| Cd(02)#1-O(2)-Cd(1) | 98.7(2)  |
| Cd(02)-O(3)-Cd(1)   | 102.9(2) |
| Cd(1)#1-O(6)-Cd(02) | 104.3(3) |

Symmetry transformations used to generate equivalent atoms:

$$\#1 -x+1,y,-z+3/2$$

**TABLE S2** Reported Covalent, and Tetrel bond lengths (Å) distances for Pb(II) complexes.

| Complexes                                                                               | Bond lengths (Å)                              | Bond Nature   | Ref |
|-----------------------------------------------------------------------------------------|-----------------------------------------------|---------------|-----|
| [PbL]ClO <sub>4</sub> ] <sub>n</sub> .nH <sub>2</sub> O                                 | Pb-N 2.408(4)-2.513(4)                        | Covalent      | 1   |
|                                                                                         | <b>2.934(4)</b>                               | <b>Tetrel</b> |     |
|                                                                                         | Pb-O 2.382(4)                                 | Covalent      |     |
| {[Pb(HL)(OAc)]ClO <sub>4</sub> }] <sub>n</sub>                                          | <b>ClO<sub>4</sub><sup>-</sup> 3.201(5)</b>   | <b>Tetrel</b> | 1   |
|                                                                                         | Pb-N 2.612(6)-2.755(7)                        | Covalent      |     |
|                                                                                         | Pb-O 2.572(5)-2.515(6)                        | Covalent      |     |
|                                                                                         | <b>ClO<sub>4</sub><sup>-</sup> 3.047(7)</b>   | <b>Tetrel</b> |     |
| [PbL(NO <sub>2</sub> )] <sub>n</sub>                                                    | ClO <sub>4</sub> <sup>-</sup> 3.309(10)       | <b>Tetrel</b> | 1   |
|                                                                                         | Pb-N 2.452(4)-2.837(3)                        | Covalent      |     |
|                                                                                         | <b>3.436(4)</b>                               | <b>Tetrel</b> |     |
| [PbLN <sub>3</sub> ] <sub>n</sub>                                                       | Pb-O 2.384(5)-2.904(5)                        | Covalent      | 1   |
|                                                                                         | <b>3.299(4)</b>                               | <b>Tetrel</b> |     |
|                                                                                         | Pb-N 2.571(3)-2.837(3)                        | Covalent      |     |
| [Pb <sub>2</sub> (HL) <sub>2</sub> (NO <sub>3</sub> ) <sub>2</sub> (NCS) <sub>2</sub> ] | <b>3.436(4)</b>                               | <b>Tetrel</b> | 1   |
|                                                                                         | N <sub>3</sub> <sup>-</sup> 2,321(3)-2.883(3) | Covalent      |     |
|                                                                                         | Pb-O 2.335(3)                                 | Covalent      |     |
|                                                                                         | Pb-N 2.663(3)-2.460(4)                        | Covalent      |     |
| [PbL(OAc)] <sub>2</sub>                                                                 | Pb-O 2.555(2)-2.882(2)                        | Covalent      | 1   |
|                                                                                         | <b>Pb-S NCS- 3.2246(11)</b>                   | <b>Tetrel</b> |     |
|                                                                                         | Pb-N 2.490(3)-2.613(4)                        | Covalent      |     |
|                                                                                         | <b>3.030(4)-3.489(3)</b>                      | <b>Tetrel</b> | 1   |
|                                                                                         | Pb-O 2.383(3)-2.753(4)                        | Covalent      |     |
|                                                                                         |                                               | This work     |     |

**TABLE S3** EDX analysis of weight (%) contribution of elements

| Complex  | % C   |      | % O   |       | % Cd  |       | % S   |      | % Na  |      |
|----------|-------|------|-------|-------|-------|-------|-------|------|-------|------|
|          | Calcd | Obsd | Calcd | Obsd  | Calcd | Obsd  | Calcd | Obsd | Calcd | Obsd |
| <b>1</b> | 41.6  | 42   | 17.41 | 17.88 | 25.8  | 26.02 | 8.77  | 8.81 | 5.31  | 5.29 |

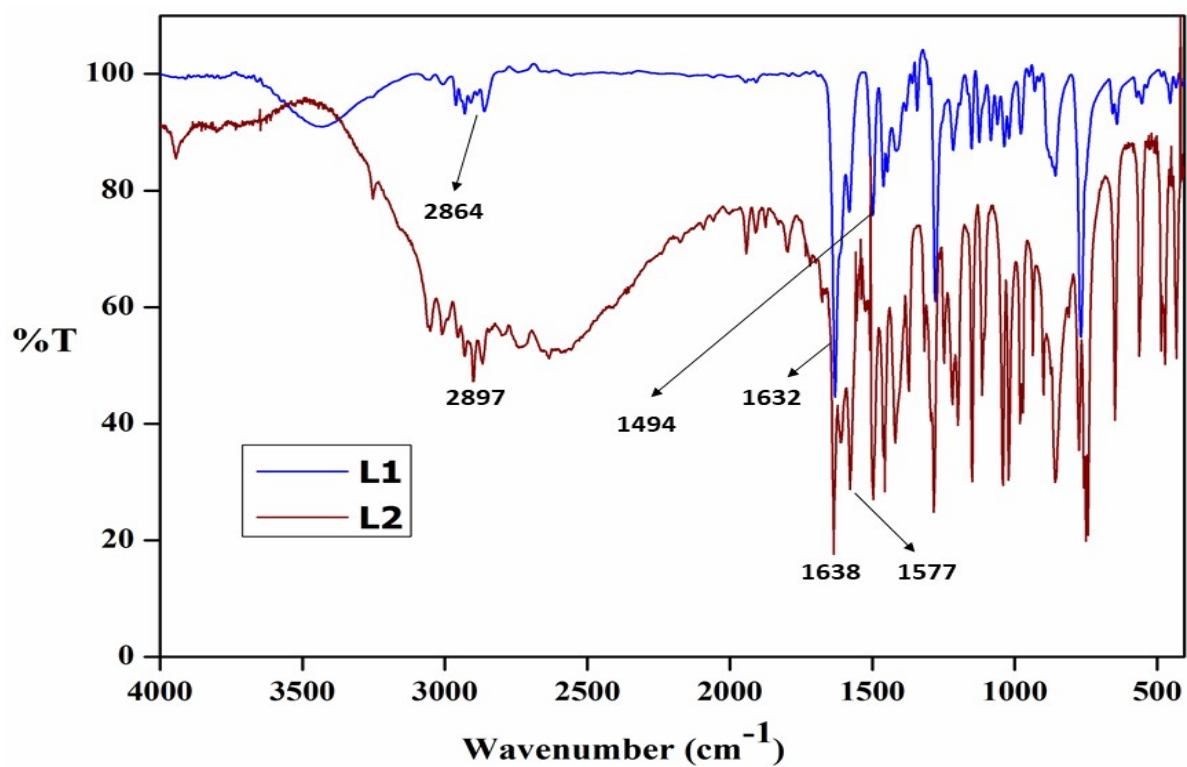**Fig.S1.** Representative IR spectra for Salen ligands.

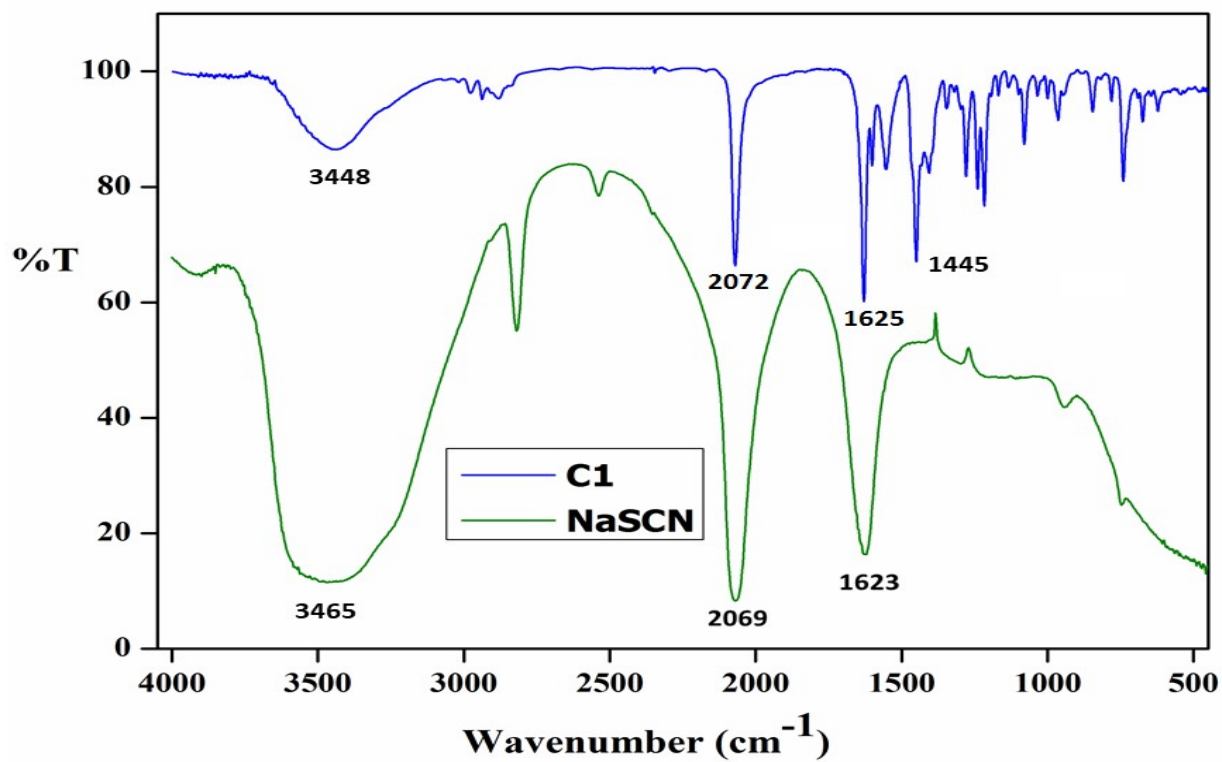

Fig.S2. Representative IR spectra for 1.

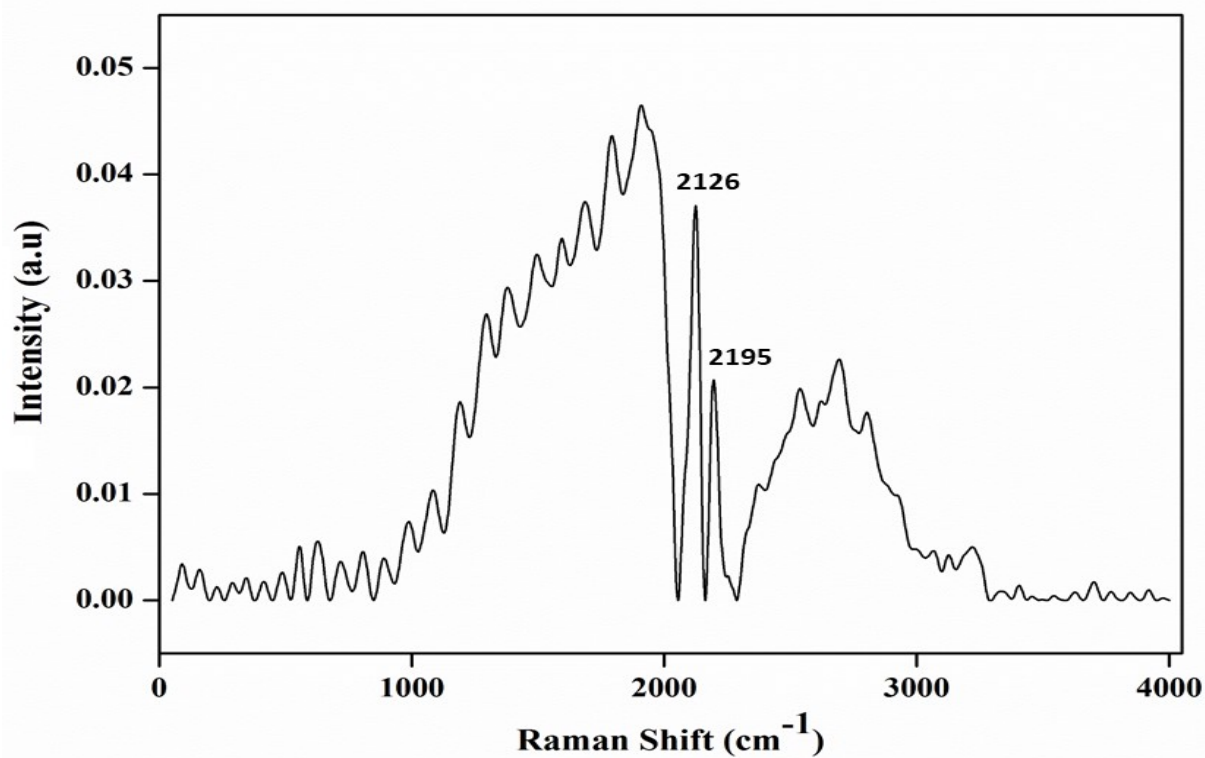

Fig.S3. Representative Raman spectra for 1.

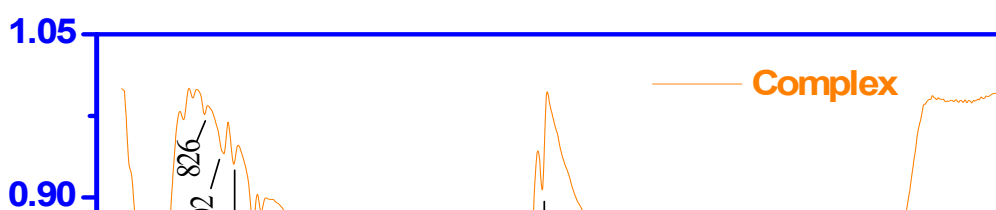

Fig.S2. Representative IR spectra for 2.

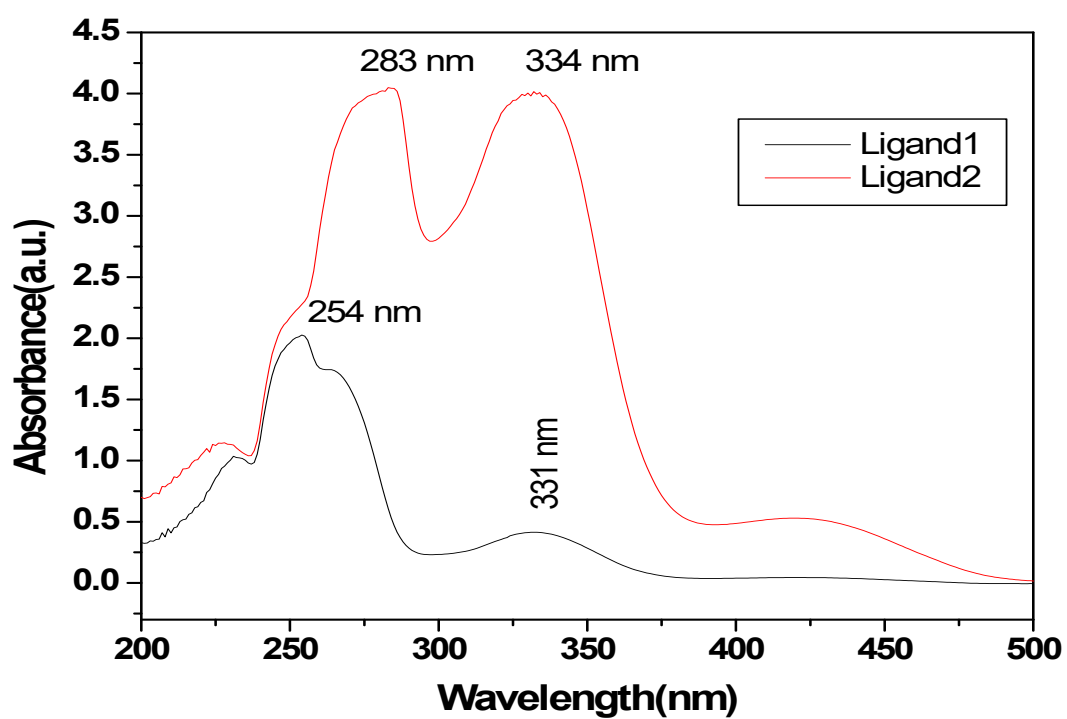

Fig.S4. Representative UV-Vis for the Salen ligands.

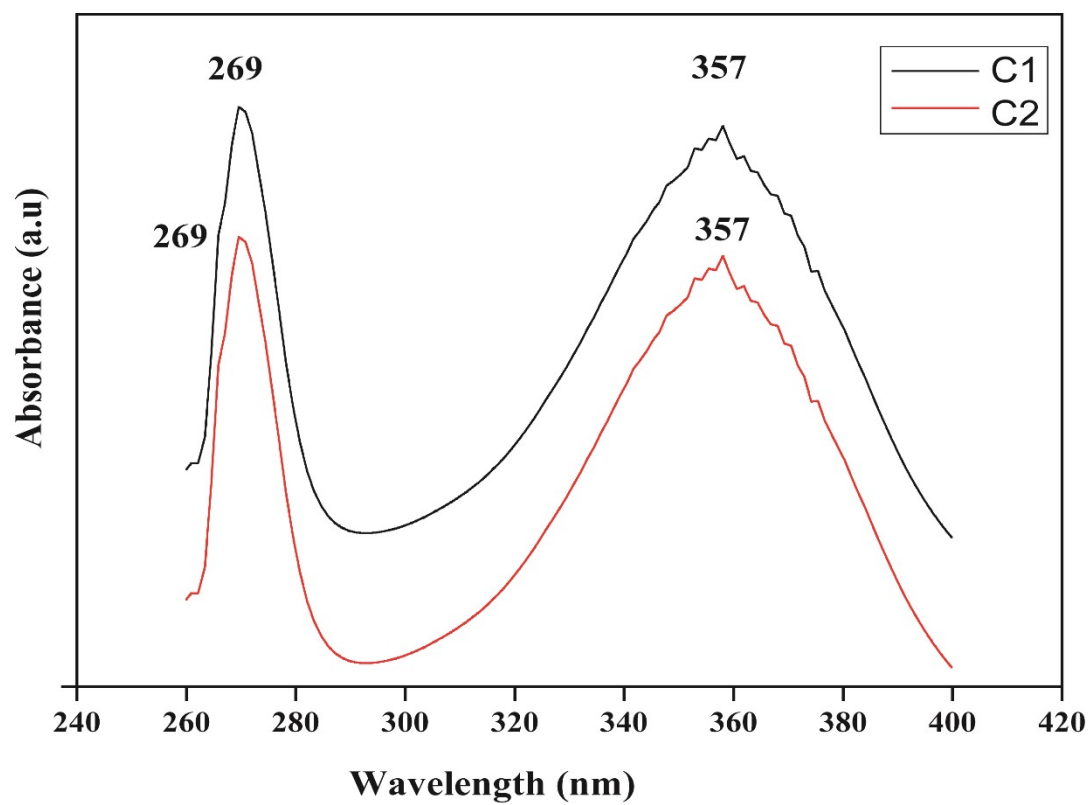

Fig.S5. Representative UV-Vis for the complexes.

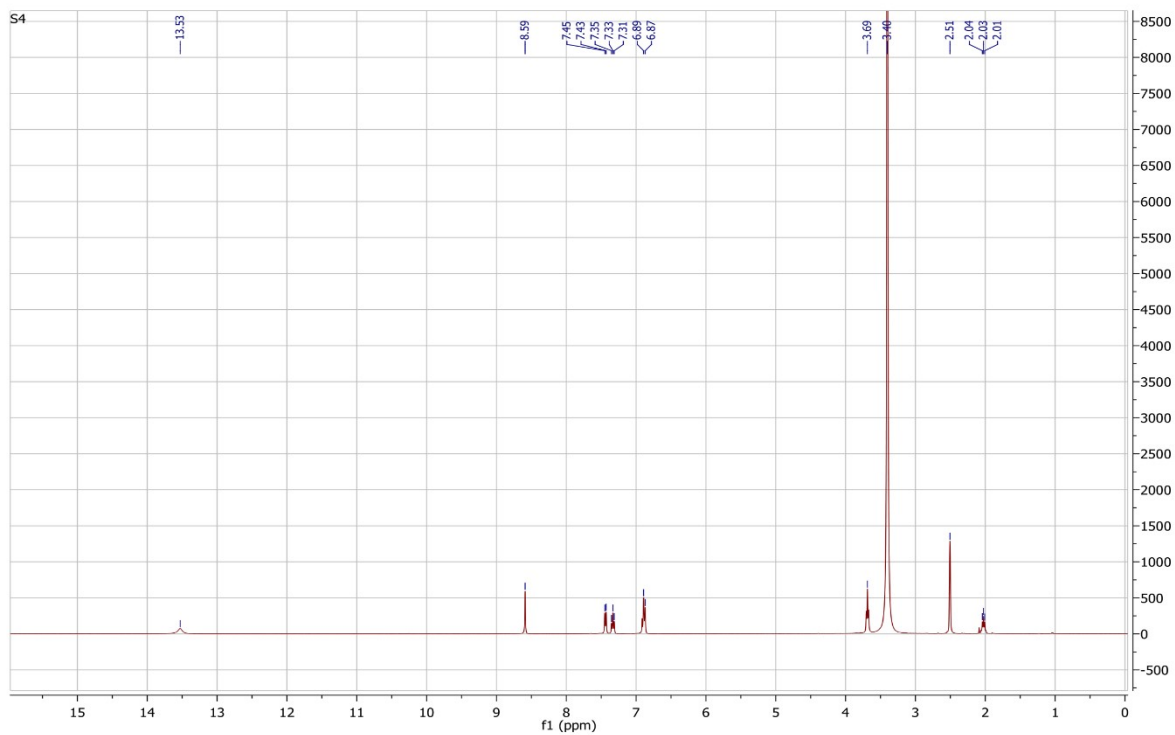

Fig.S6. Representative  $^1\text{H}$  NMR spectra for  $\text{H}_2\text{L}^1$ .

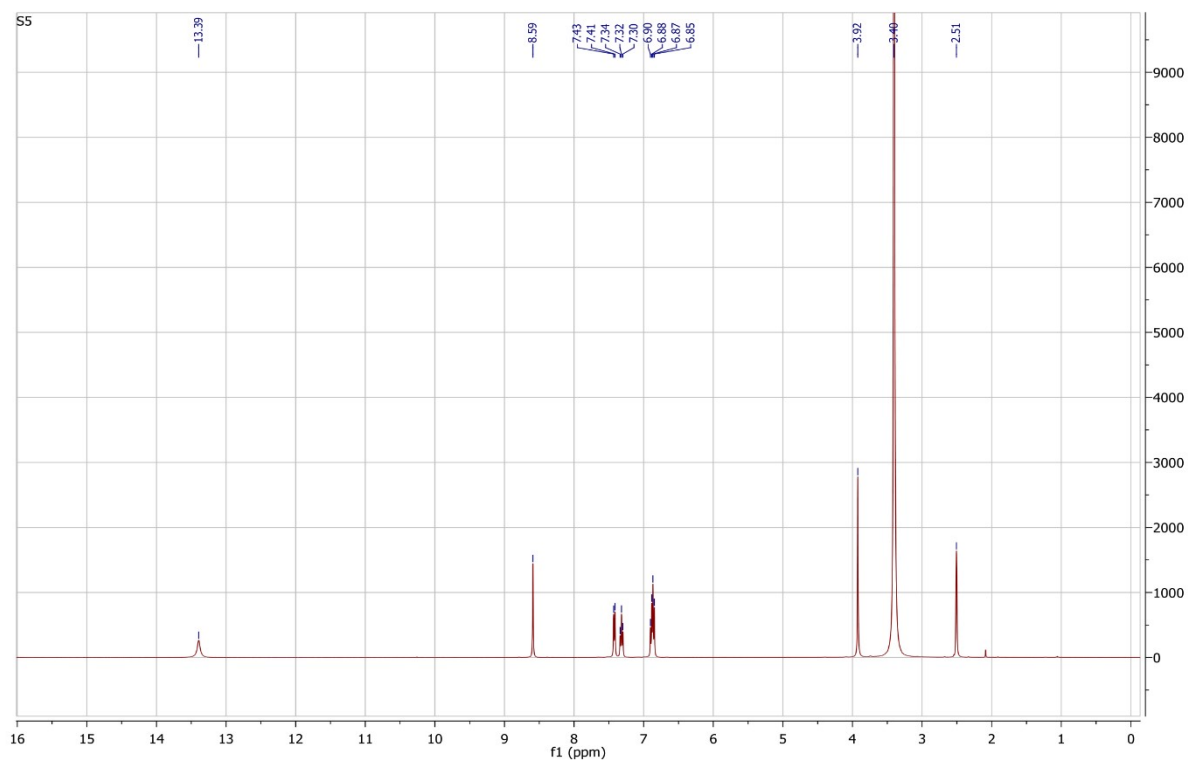

Fig.S6. Representative  $^1\text{H}$  NMR spectra for  $\text{H}_2\text{L}^2$ .

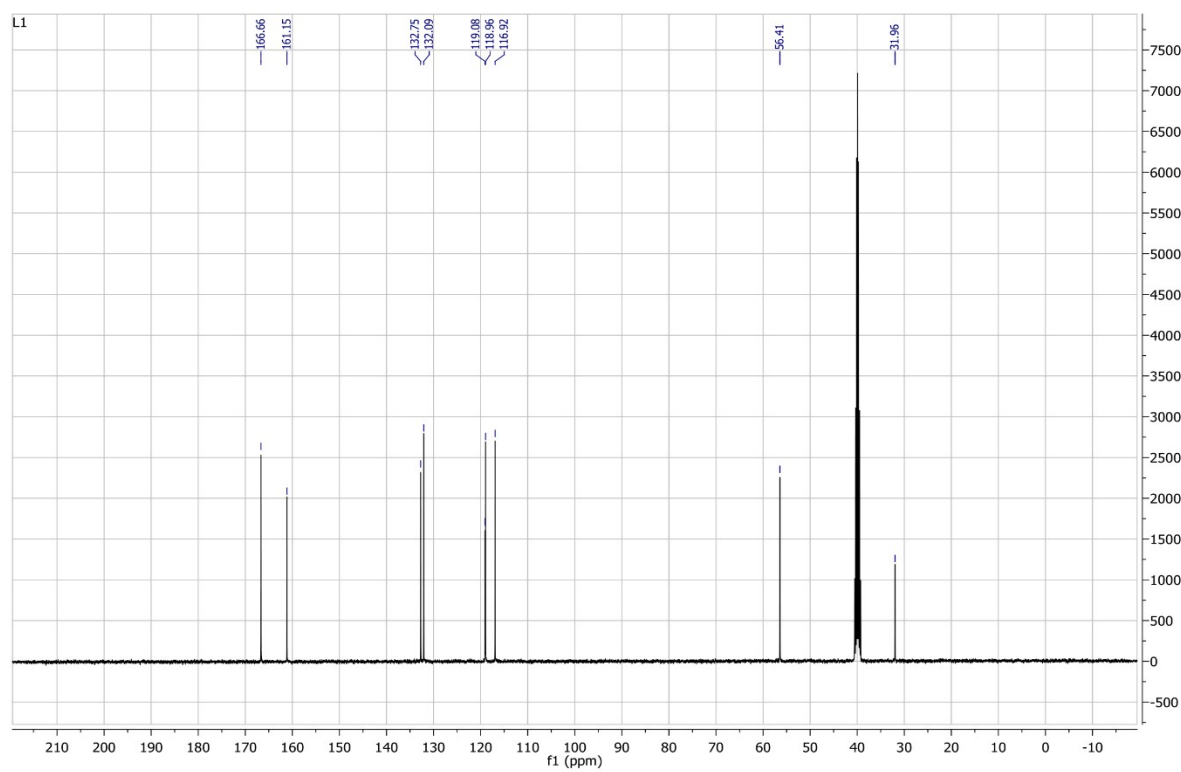

Fig.S7. Representative  $^{13}\text{C}$  NMR spectra for  $\text{H}_2\text{L}^1$ .

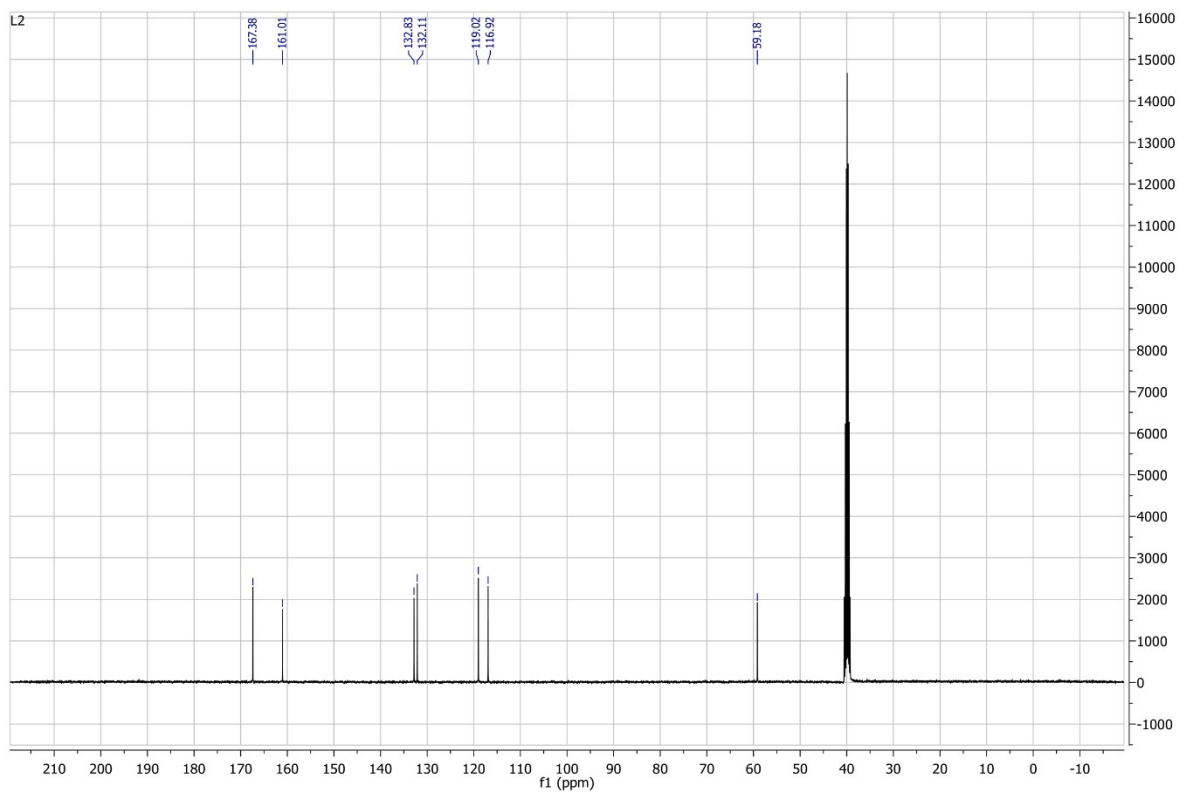

Fig.S7. Representative  $^{13}\text{C}$  NMR spectra for  $\text{H}_2\text{L}^2$ .

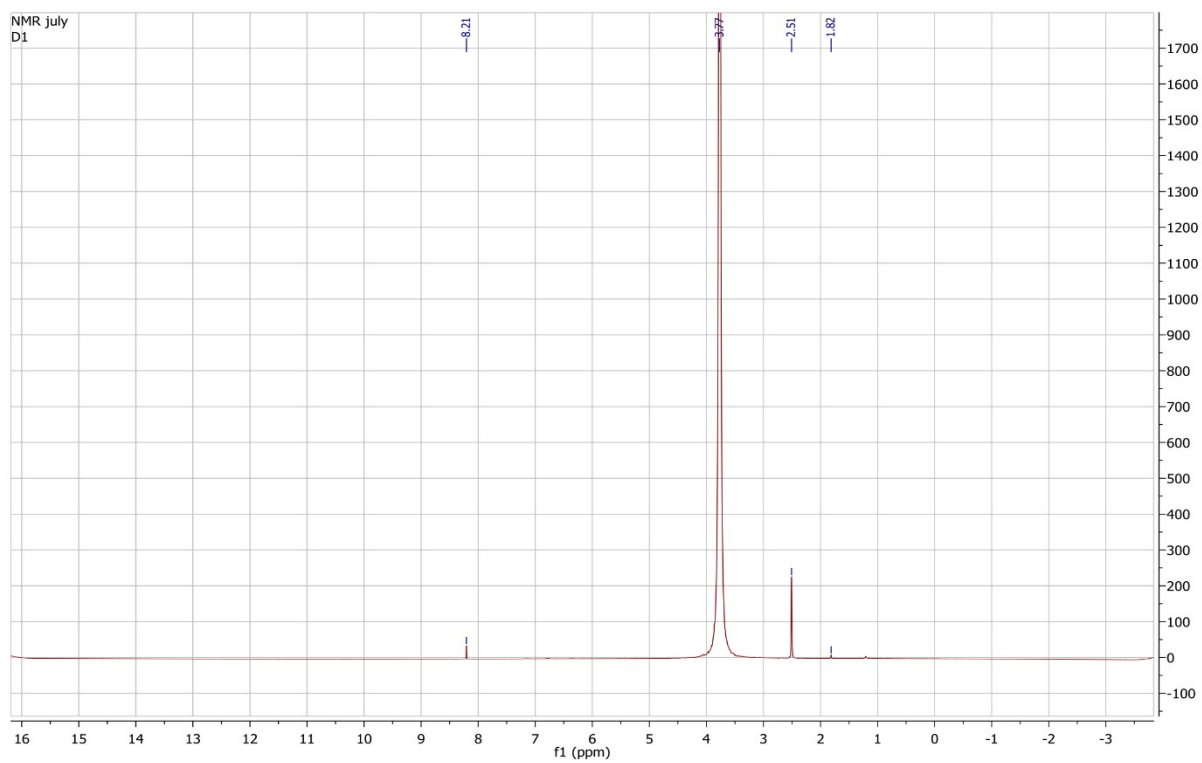

Fig.S8. Representative  $^1\text{H}$  NMR spectra for **1**.

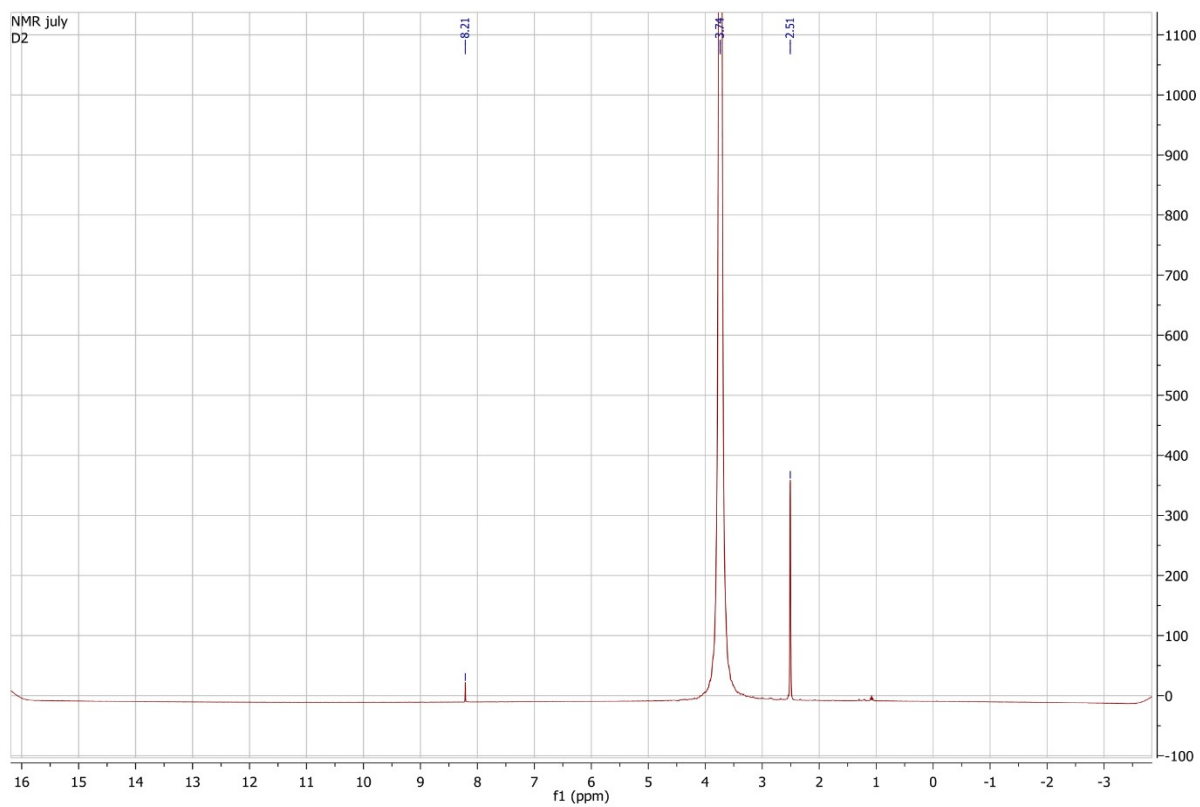

Fig.S8. Representative  $^1\text{H}$  NMR spectra for 2.

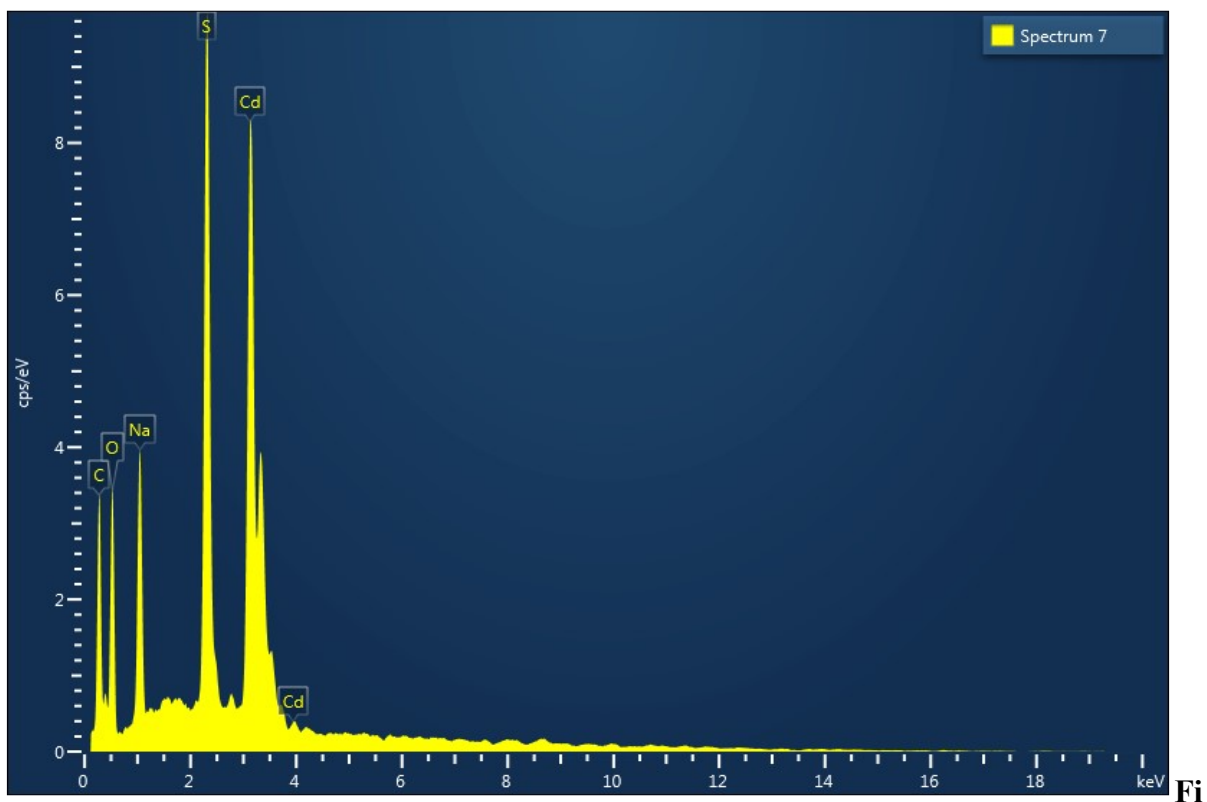

g.S9. EDX profile for 1.



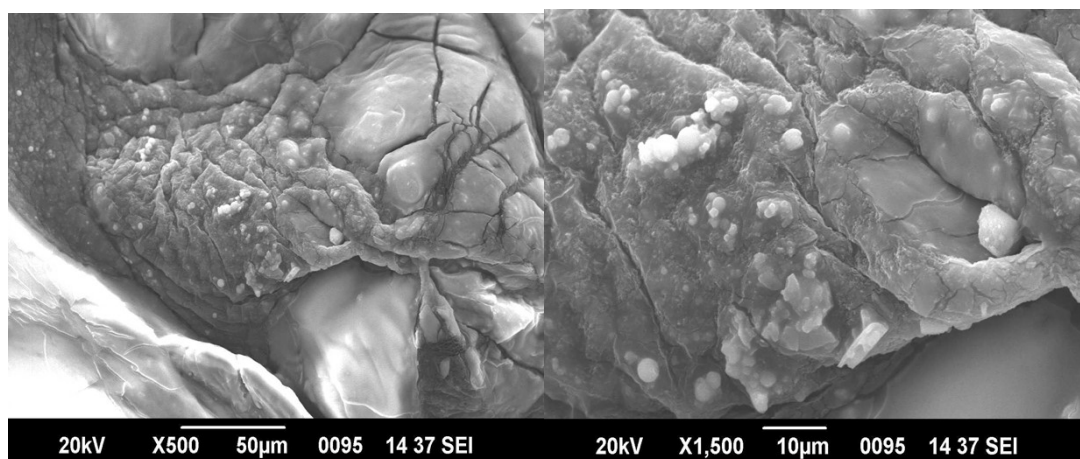

(a)

(b)

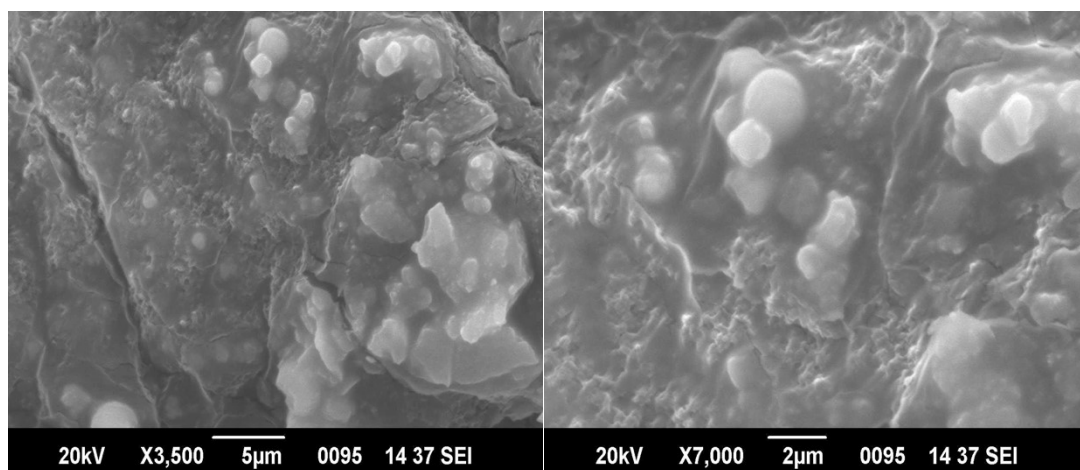

(c)

(d)

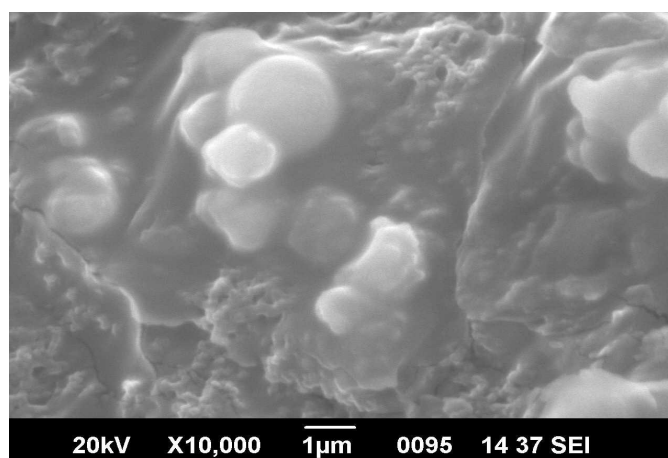

(e) Fig.S10. SEM image profile for 1 (a-e)

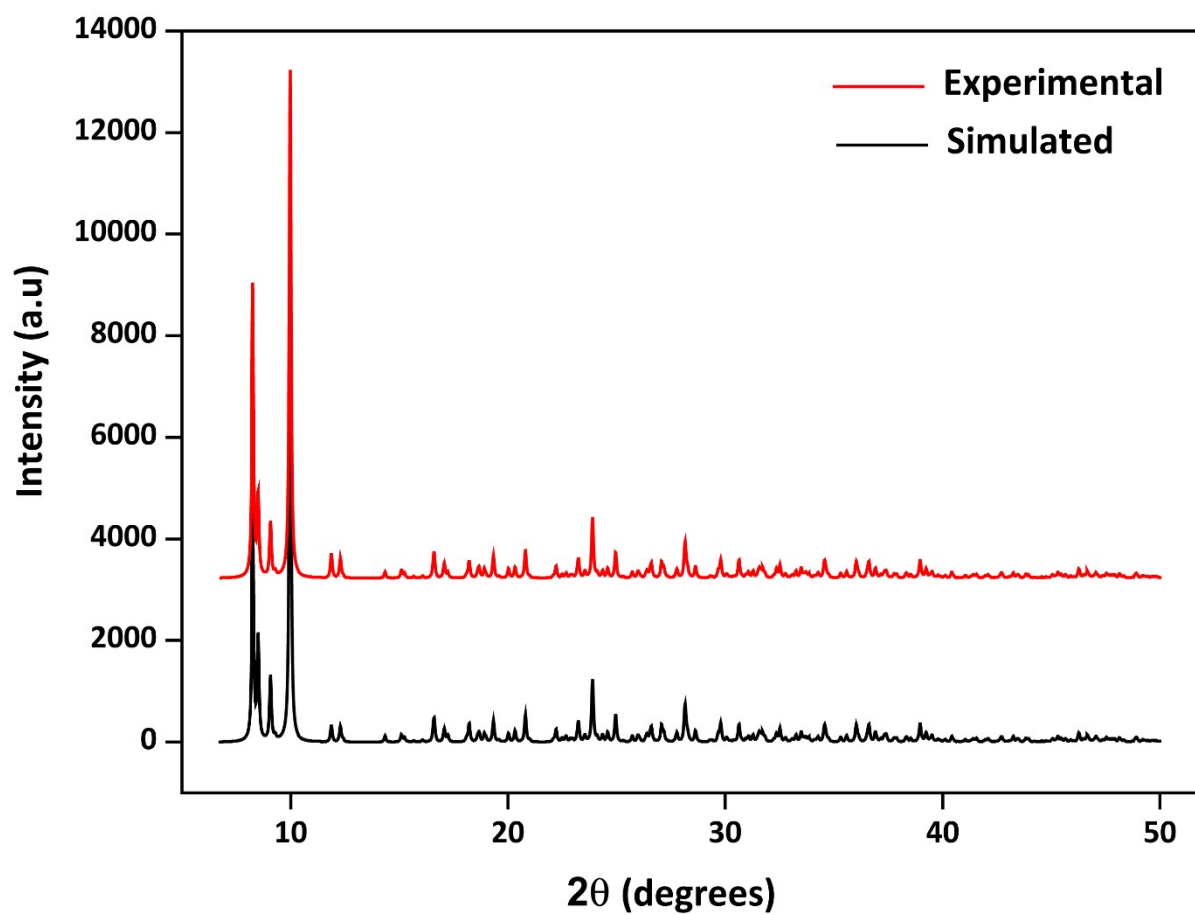

Fig.S11. PXRD profile for 1.

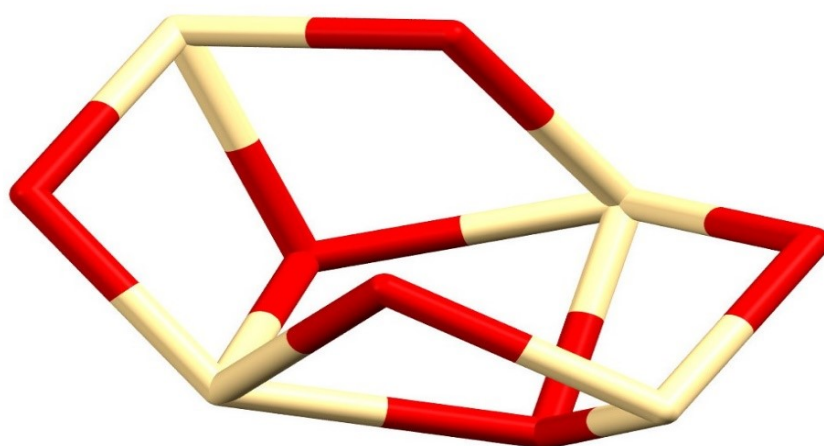

Fig.S12. An unusual open cubane structure was observed in the complexes.

## References

1 G. Mahmoudi, D. A. Safin, M. P. Mitoraj, M. Amini, M. Kubicki, T. Doert, F. Locherer, and M. Fleck, *Inorg. Chem. Front.*, 2017, **4**, 171–182.
